# Supplementary material for: Hydroxyl Radical Generating Monovalent Copper Particles for Antimicrobial Application
Source: Hindawi journal article supplement (doi:10.1155/2023/8812824), 2023-04-25
Supplement: f1 [file 8812824.f1.docx]

Supplementary Information

Hydroxyl Radical Generating Monovalent Copper Particles for Antimicrobial Application

Tze Hao Tan1,*, Hao Zhang1, Bingqiao Xie1, Riti Mann2, Lingyi Peng1, Sung Lai Jimmy Yun3, Rose Amal1, Zi Gu1,*, Cindy Gunawan2,­*

1. School of Chemical Engineering, UNSW Sydney, NSW 2052, Australia
2. Australian Institute for Microbiology and Infection, University of Technology Sydney, Ultimo, NSW 2007, Australia
3. Qingdao International Academician Park Research Institute, Qingdao, Shandong 266000, P.R.China

Email: [tzehaotan@gmail.com](mailto:tzehaotan@gmail.com), [zi.gu1@unsw.edu.au](mailto:zi.gu1@unsw.edu.au), cindy.gunawan@uts.edu.au

## **Materials and Methods**

## **Materials**

## All reagents were sourced from Sigma-Aldrich or Chem-Supply Pty Ltd: Cu(NO3)2.6H2O, NaOH, ammonia, NaH2PO2, phosphate buffer, Tris-HCl solution, and Mueller-Hinton broth (MHB).

## **Preparation of Cu(OH)2**

10 g of Cu(NO3)2.6H2O was dissolved in 100 mL of deionised water followed by the addition of 10 mL of concentrated ammonia solution. The Cu solution precipitated initially but subsequently redissolved to form dark blue Cu complex solution. Then, 40 mL of 80 g/L NaOH solution was added to the Cu complex solution to initiate the precipitation of Cu(OH)2 from the solution. The Cu(OH)2 precipitate was washed with deionised water by centrifugation and dried in vacuum overnight. The precipitated solid was grounded with a mortar and pestle.

## **Phosphorisation of Cu(OH)2**

The prepared Cu(OH)2 was mixed with NaH2PO2 in a 1:5 mass ratio via grinding. The evenly mixed powder was then transferred to a crucible and calcined in an argon (Ar) atmosphere at the specified temperature. The ramping rate was set at 2 oC to slow down the rigorous phosphorisation reaction. Ar flow was maintained at 40 mL/min during the calcination process to preserve an inert environment for the phosphorisation process. During the phosphorisation process, NaH2PO2 decomposes to form reactive phosphine gas (i.e. PH3), which subsequently reacts with CuO particles (from the dehydration of Cu(OH)2) to form Cu3P.

## **Characterisation**

The crystal phase of the prepared particles was analysed using a PANalytical Xpert Multipurpose X-ray Diffraction (XRD) System. The bulk phase compositions were determined from the diffraction pattern using Highscore Plus. The hydrodynamic sizes and zeta potentials of the particles were measured with Malvern Zetasizer Nano. XPS measurements were performed with a Thermo Scientific ESCALAB250i X-Ray Photoelectron Spectrometer using a monochromatic Aluminium K-alpha radiation source (energy ~1.5 keV). The XPS Spectrometer was calibrated using binding energy peaks of Au 4f7/2 = 83.96 eV, Ag 3d5/2 = 368.21 eV, and Cu 2p3/2 = 932.62 eV. Qualitative and quantificative analyses of surface Cu species were performed based on the works of Biesinger.23 Prior to the characterisation, the particles were suspended in either deionised water, phosphate buffer or TrisHCl solution, and sonicated for 2 min. Transmission electron microscopy (TEM) of the particles were performed with Shimadzu CM200. TEM samples were prepared by first suspending the particles in ethanol, followed by a titration of 30 µL of the mixture on Cu grids. Solubility of particles were tested by suspending 20 mg of particles in 20 mL of either MHB solution (pH 6) or deionised water for 7 days, before being filtered with a 0.22 µm PTFE filtered and analysed with Optima 7000 inductively coupled plasma optical emission spectrometer (ICP-OES).

## **Coumarin Test**

The efficacy of the phosphorised Cu as an antimicrobial agent was tested by examining their capability in generating OH radicals. The OH-coumarin species, which has an emission at 450 nm, was applied as a detecting probe by the following equation:

|  | (4) |
| --- | --- |

10 mg of synthesised particles were dispersed with 20 mL 4 µM coumarin solution via sonication for 1 min and stirred with a magnetic stirrer. 2.5 mL suspension were collected at 1 h intervals and filtered with an 0.22 µm cellulose acetate filter. The photoluminescence (PL) spectra were captured on a spectrofluorometer (FluoroMax-4, Horiba) with a 315 nm excitation wavelength.

## **Minimum Inhibitory Concentration Test**

A single colony of *S. aureus* (ATCC 29213) and *E. coli* (K12) was cultured in 10 mL of Mueller-Hinton broth (MHB) at 37 OC with shaking at 200 rpm overnight. Subsequently, a subculture was prepared from the overnight culture by diluting 1:100 in 10 mL MHB and allow to grow to mid-log phase. Then, the bacteria were diluted to 106 CFU/mL with pH-adjusted MHB (pH 6, containing 40 mM Tris-HCl). After 60 s sonication, 80 µL of particle suspension was added into the 96-well plate, followed by the addition of 80 µL of the subculture bacteria suspension. The plates were incubated at 37 OC for 16 h, and the absorbance at 600 nm was measured with a microtiter plate reader (FLUOstar Omega, BMG Labtech). The minimum inhibitory concentration (MIC) values were defined as the lowest concentration of sample that showed no visible growth and inhibited cell growth by more than 95%. Positive controls without particles and negative controls without bacteria were included. The assay included three replicates and was repeated in three independent experiments.

Growth rate values calculation:

| Growth rate values = (ODexp – ODneg) / (ODbac - ODmed) x 100 | (5) |
| --- | --- |

ODexp: The absorbance of particles and bacteria in culture medium

ODneg: The absorbance of particles in culture medium

ODbac: The absorbance of bacteria in culture medium

ODmed: The absorbance of medium

## **Staining of CuxP Exposed Bacteria for Fluorescence Microscopy**

To prepare the bacterial inoculum for fluorescence microscopy, an overnight culture of *E. coli* K12 was grown at 37oC, 200 rpm orbital shaking for 16–17 h in Mueller–Hinton agar or broth (MH, BD, Australia), sub-diluted by 1/100 dilution with fresh MHB and incubated for a further 2 h at 37oC, 200 rpm. Cultures were pelleted down and resuspended in pH-adjusted MHB (pH 6, containing 40 mM Tris-HCl). Cells were treated at 64 µg/mL for all the particles for 1 h at 37oC, 200 rpm and stained with 5 µM FM4-64 (Biotium, USA) dye. Cultures were mounted on 1% agarose pads and imaged using the DeltaVision Elite Deconvolution microscope with an excitation/emission wavelength of 480/598 nm.

# **Additional XPS Analyses**


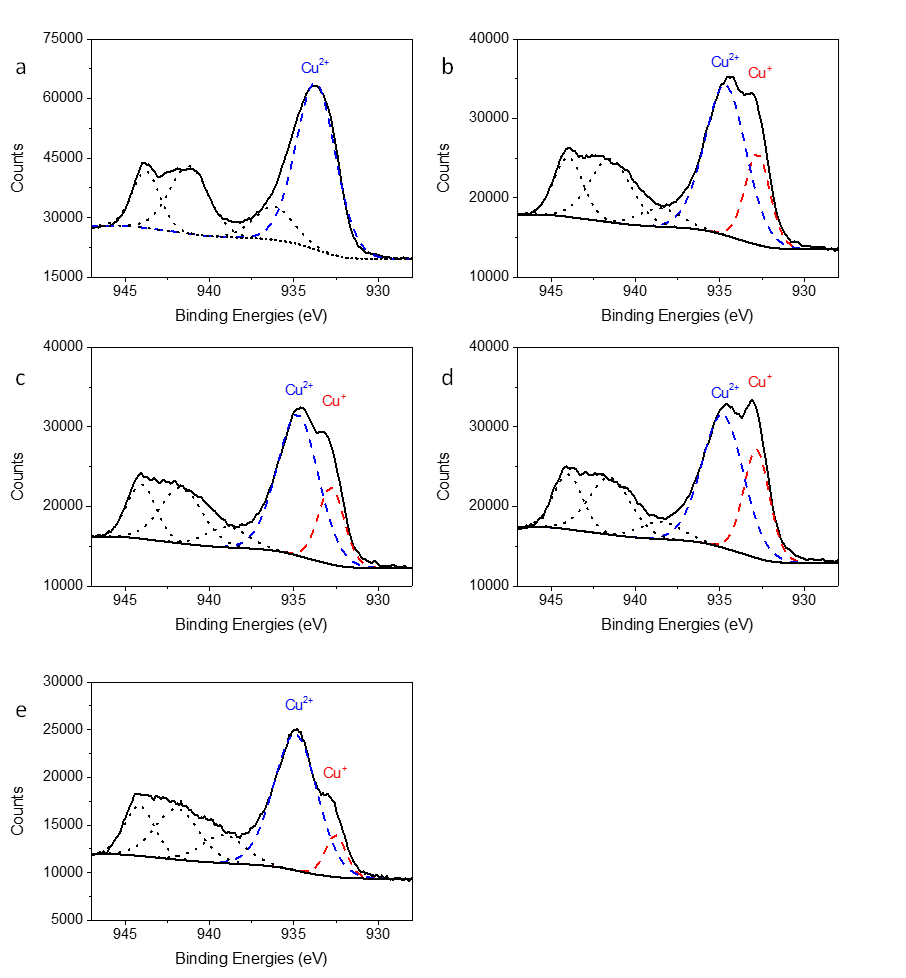


**Figure S1.** Cu 2p XPS spectra of **(A)** CuO150 and phosphorised CuxP: **(B)** CuP200, **(C)** CuP250, **(D)** CuP300, and, **(E)** CuP350. The peak area corresponding to Cu2+ and Cu+ were used to quantify the Cu surface chemical states according to the area ratio of Cu2+:Cu+ = 2.83.


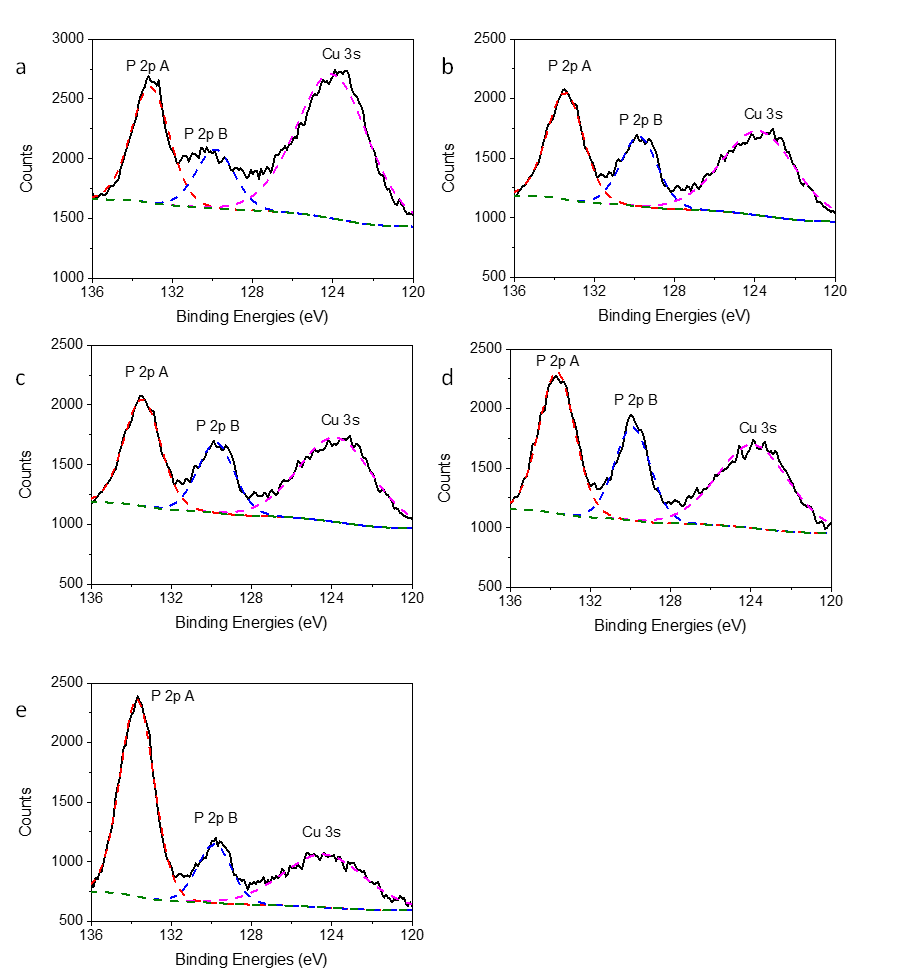


**Figure S2.** P 2p XPS spectra of **(A)** CuO150 and phosphorised CuxP: **(B)** CuP200, **(C)** CuP250, **(D)** CuP300, and, **(E)** CuP350.


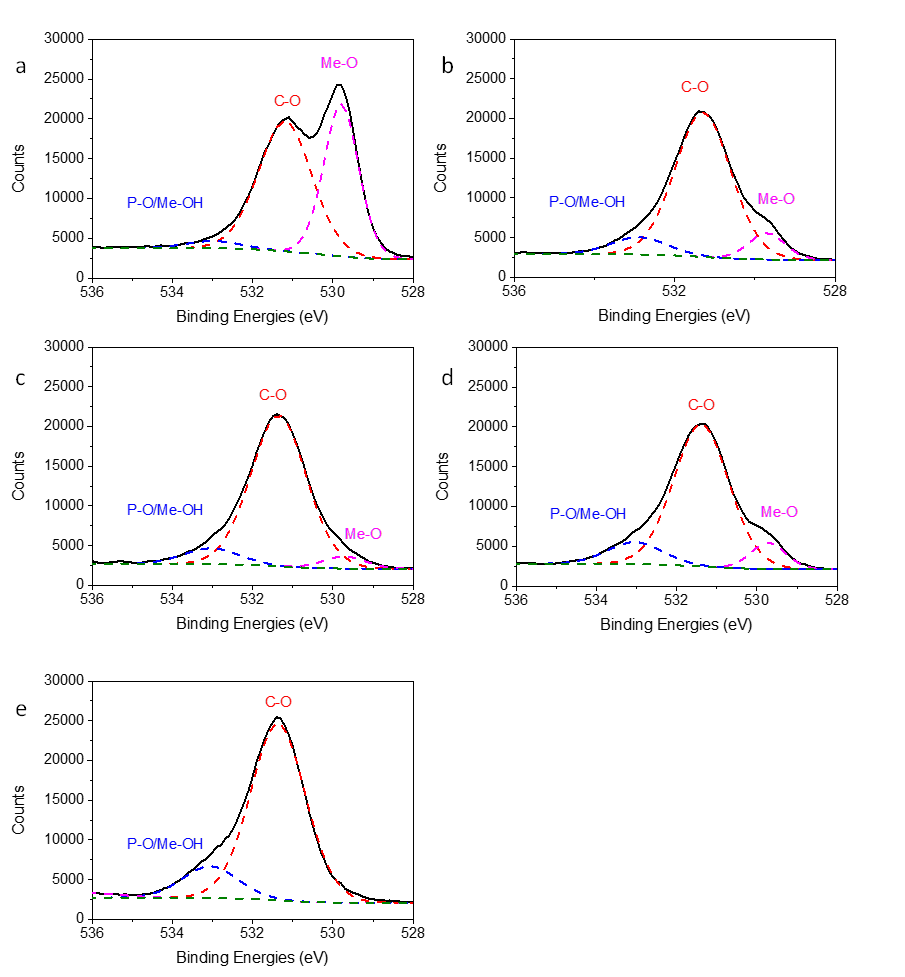


**Figure S3.** O 1s XPS spectra of **(A)** CuO150 and phosphorised CuxP: **(B)** CuP200, **(C)** CuP250, **(D)** CuP300, and, **(E)** CuP350.

**Fluorescence Microscopy**

**Figure S4.** Fluorescence micrographs of fluorescent dye (FM4-64) stained *S. aureus* after exposure to CuxP particles: **(A)** Blank, **(B)** CuO150, **(C)** CuP250, and **(D)** CuP350. The bacteria were exposed to 64 mg/L CuxP particles for 1 h prior to staining.

**Solubility of CuO and CuxP particles**

**Figure S5.** Solubility of CuO and CuxP particles in **(A)** MHB buffer solution at pH 6 and **(B)** deionised water. In both experiments, 20 mg of particles were suspended in 20 mL solution for 7 days before being filtered and analysed with ICP-OES.
